# Supplementary material
Source: PubMed Central journal article supplement (PMC5743019)
Supplement: NIHMS896442-supplement-2.pdf [file NIHMS896442-supplement-2.pdf]

**Table S1. Antibodies used in this study**

| Antibody                   | Antigen    | Source                       | Catalog Number | WB                  | IF                  |
|----------------------------|------------|------------------------------|----------------|---------------------|---------------------|
| CENP-A                     | Rabbit     | Cell signaling               | #2186S         | 1/1000              | 1/300               |
| CENP-A                     | Mouse      | MBL International            | D115-3         |                     | 1/100               |
| Phospho-Histone H3 (Ser10) | Rabbit     | Cell signaling               | #3377          | 1/1000              |                     |
| CCNE1                      | Mouse      | Santa Cruz                   | #C2510         | 1/1000              |                     |
| H3                         | Rabbit     | Novus Biological             | NB100-479      | 1/30000             |                     |
| Vinculin                   | Mouse      | Sigma                        | V9131          | 1/5000              |                     |
| $\alpha$ -Tubulin          | Mouse      | Sigma                        | T9026          | 1/10000             | 1/400               |
| LAP2                       | Mouse      | BD Bioscience                | 611000         |                     | 1/400               |
| CREST (ACA)                | Human      | Antibodies Incorporated      | 15-235         |                     | 1/6000              |
| Cdk2                       | Rabbit     | Santa Cruz                   | S00026         | 1/1000              |                     |
| FBW7                       | Rabbit     | Bethyl                       | A301-720A      | 1/1000              |                     |
| HA                         | Mouse      | Santa Cruz                   | 7392           | 1/1000              | 1/1000              |
| HJURP                      | Rabbit     | Abcam                        | 100800         | 1/1000              |                     |
| Phospho-CENP-A(S18)        | Rabbit     | Cell signaling (custom made) |                | 1/1000              | 1/100               |
| CENP-B                     | Rabbit     | Abcam                        | Ab25734        | 1/1000              | 1/200               |
| CyclinA2                   | Rabbit     | Santa Cruz                   | sc751          | 1/1000              |                     |
| H2A                        | Rabbit     | Active Motif                 | 39235          | 1/3000              |                     |
| CENP-C                     | Guinea pig | MBL International            | PD030          |                     | 1/1000              |
| Phospho-CENP-A(S68)        | Rabbit     | <i>Homemade</i>              | n/a            | 1/100(1 $\mu$ g/mL) | 1/100(8 $\mu$ g/mL) |
| GAPDH                      | Rabbit     | Santa Cruz                   | sc-25778       | 1/1000              |                     |
| Ndc80(Hec1)                | Mouse      | Abcam                        | ab3613         |                     | 1/400               |
| SNAP                       | Rabbit     | NEB                          | P9310S         | 1/10000             |                     |
